# Supplementary material
Source: PubMed Central journal article supplement (PMC5584560)
Supplement: NIHMS895601-supplement.pdf [file NIHMS895601-supplement.pdf]

## **Supplementary Material**

### **Gestational Diabetes and Offspring Birth Size at Elevated Environmental Pollutant Exposures**

Damaskini Valvi, Youssef Oulhote, Pal Weihe , Christine Dalgård, Kristian S. Bjerve, Ulrike Steuerwald and Philippe Grandjean.

#### **Contents**

**Figure S1. Conceptual path diagram in analyses using structural equation models (SEMs). (Page 2)**

**Table S1. Factor loadings and estimated correlation of measured environmental pollutant concentrations to the latent constructs used in SEM analyses. (Page 3)**

**Table S2. Correlation coefficients between pairs of environmental pollutants measured in maternal biological samples and cord blood. (Page 4)**

**Table S3. Change in birth size measures per doubling of environmental pollutant concentrations in maternal biological samples and cord blood, according to sex. (Page 5)**

**Figure S1. Conceptual path diagram of SEM analyses for the associations of environmental pollutant exposures at pregnancy with gestational diabetes mellitus and birth size measures, and the hypothesised role of gestational diabetes as a possible mediator in the associations with birth size.**

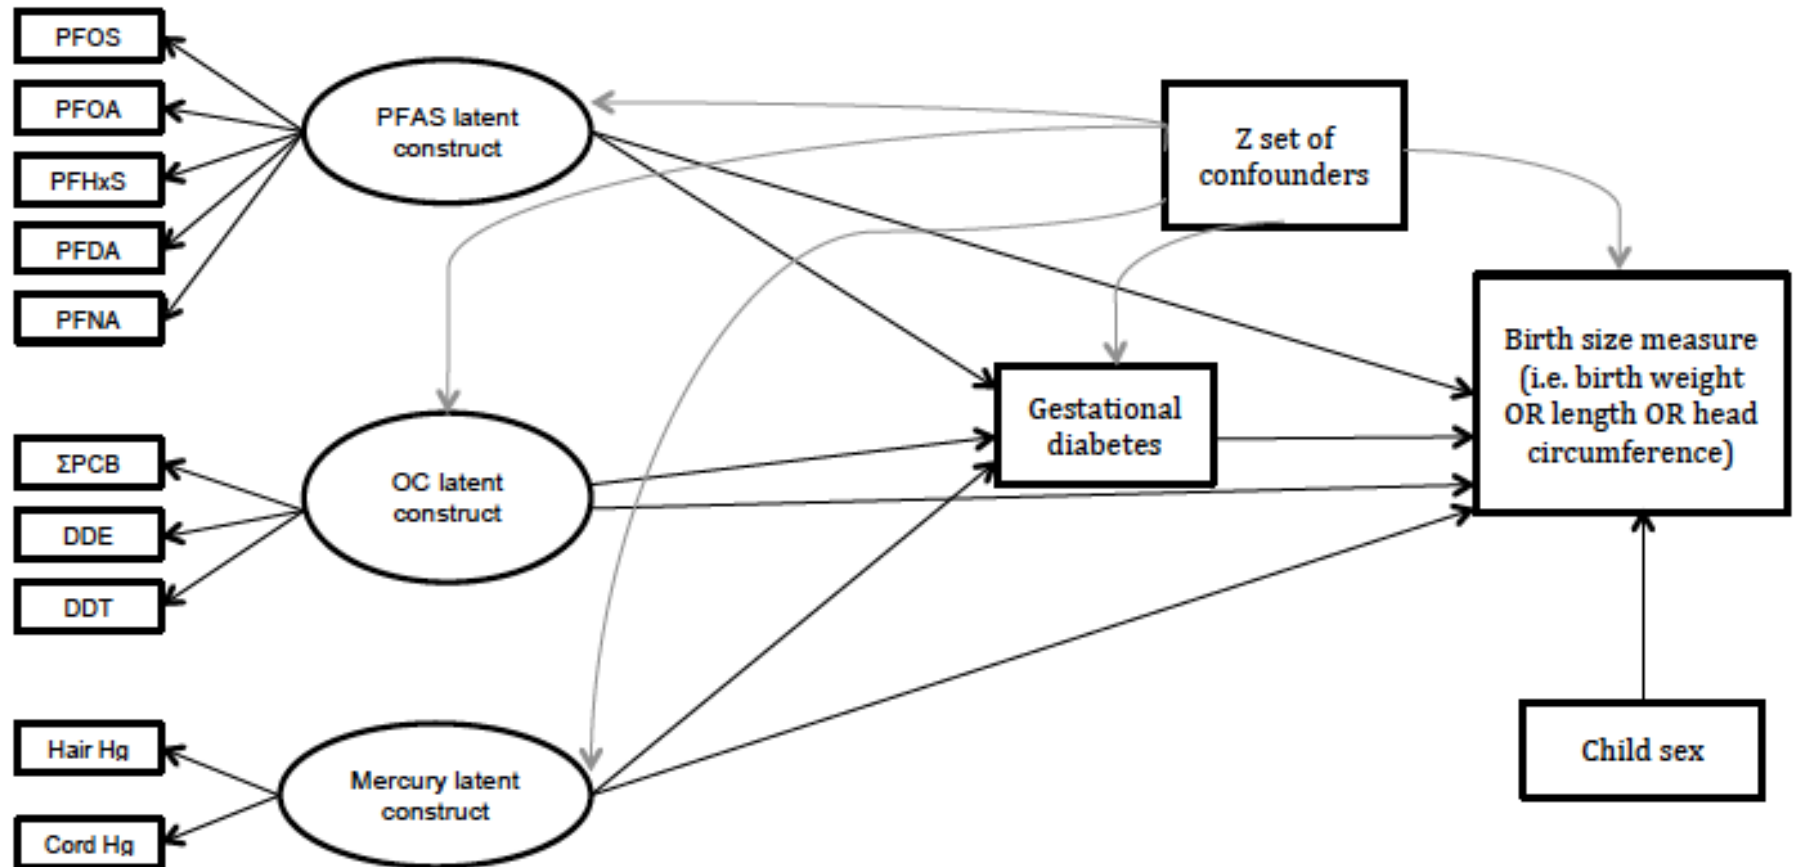

**Table S1. Factor loadings and estimated correlation of measured environmental pollutant concentrations to their latent construct used in SEM analyses.**

| <b>Latent construct</b> | <b>Indicators</b>  | <b>Factor loading</b> | <b>SE</b> | <b><i>p</i>-value</b> | <b>Standardized coefficient</b> |
|-------------------------|--------------------|-----------------------|-----------|-----------------------|---------------------------------|
| <b>OCs</b>              | Serum DDE          | 1                     | 0         | NA                    | 0.98                            |
|                         | Serum $\Sigma$ PCB | 0.73                  | 0.03      | <0.001                | 0.92                            |
|                         | Serum DDT          | 0.95                  | 0.05      | <0.001                | 0.86                            |
| <b>PFASs</b>            | Serum PFOS         | 1                     | 0         | NA                    | 0.66                            |
|                         | Serum PFOA         | 0.43                  | 0.09      | <0.001                | 0.22                            |
|                         | Serum PFHxS        | 0.53                  | 0.18      | 0.005                 | 0.92                            |
|                         | Serum PFDA         | 2.10                  | 0.14      | <0.001                | 0.88                            |
|                         | Serum PFNA         | 1.99                  | 0.11      | <0.001                | 0.12                            |
| <b>Mercury</b>          | Hair mercury       | 1                     | 0         | NA                    | 0.95                            |
|                         | Cord blood mercury | 0.82                  | 0.04      | <0.001                | 0.88                            |

SE: standard Error  
 NA: not applicable

**Table S2. Pearson correlation coefficients between pairs of environmental pollutant concentrations (log<sub>2</sub>-transformed) measured in maternal biological samples during pregnancy and cord blood.**

|                     | <b>Serum DDE</b> | <b>Serum DDT</b> | <b>Serum PFOS</b> | <b>Serum PFOA</b> | <b>Serum PFHxS</b> | <b>Serum PFDA</b> | <b>Serum PFNA</b> | <b>Hair mercury</b> | <b>Cord mercury</b> |
|---------------------|------------------|------------------|-------------------|-------------------|--------------------|-------------------|-------------------|---------------------|---------------------|
| <b>Serum ΣPCB</b>   | 0.88             | 0.64             | 0.25              | -0.06             | 0.02               | 0.48              | 0.52              | 0.35                | 0.33                |
| <b>Serum DDE</b>    | 1                | 0.78             | 0.17              | -0.02             | 0.10               | 0.42              | 0.49              | 0.33                | 0.29                |
| <b>Serum DDT</b>    |                  | 1                | 0.16              | -0.04             | 0.20               | 0.36              | 0.37              | 0.36                | 0.37                |
| <b>Serum PFOS</b>   |                  |                  | 1                 | 0.55              | 0.12               | 0.56              | 0.63              | 0.19                | 0.23                |
| <b>Serum PFOA</b>   |                  |                  |                   | 1                 | 0.17               | 0.14              | 0.26              | -0.06               | -0.03               |
| <b>Serum PFHxS</b>  |                  |                  |                   |                   | 1                  | 0.13              | 0.08              | 0.20                | 0.17                |
| <b>Serum PFDA</b>   |                  |                  |                   |                   |                    | 1                 | 0.80              | 0.45                | 0.41                |
| <b>Serum PFNA</b>   |                  |                  |                   |                   |                    |                   | 1                 | 0.39                | 0.36                |
| <b>Hair mercury</b> |                  |                  |                   |                   |                    |                   |                   | 1                   | 0.83                |

**Table S3. Change in birth size measures per doubling of environmental pollutant concentrations in maternal biological samples and cord blood, according to sex.**

| <b>Birth size measure/<br/>Exposure variable</b> | <b>Total<br/>N</b> | <b>Girls (47.4 %)<br/><math>\beta</math> (95%CI)<sup>a</sup></b> | <b>Boys (52.3%)<br/><math>\beta</math> (95%CI)<sup>a</sup></b> | <b>p for sex<br/>interaction</b> |
|--------------------------------------------------|--------------------|------------------------------------------------------------------|----------------------------------------------------------------|----------------------------------|
| <b>Weight (g)</b>                                |                    |                                                                  |                                                                |                                  |
| Serum $\Sigma$ PCB                               | 564                | -5 (-62, 51)                                                     | 12 (-48, 74)                                                   | 0.71                             |
| Serum DDE                                        | 564                | -39 (-94, 15)                                                    | -5 (-62, 51)                                                   | 0.39                             |
| Serum PFOS                                       | 604                | 5 (-124, 135)                                                    | -150 (-282, -17)                                               | 0.08                             |
| Serum PFOA                                       | 604                | 58 (-48, 164)                                                    | -71 (-184, 42)                                                 | 0.04                             |
| Serum PFHxS                                      | 604                | 20 (-24, 65)                                                     | 12 (-36, 59)                                                   | 0.75                             |
| Serum PFDA                                       | 604                | -28 (-110, 54)                                                   | -44 (-133, 44)                                                 | 0.81                             |
| Serum PFNA                                       | 604                | -39 (-125, 46)                                                   | -33 (-136, 69)                                                 | 0.96                             |
| Hair mercury                                     | 561                | -6 (-48, 35)                                                     | 13 (-33, 60)                                                   | 0.61                             |
| Cord blood mercury                               | 538                | 12 (-35, 59)                                                     | 3 (-51, 56)                                                    | 0.63                             |
| <b>Length (cm)</b>                               |                    |                                                                  |                                                                |                                  |
| Serum $\Sigma$ PCB                               | 564                | 0.15 (-0.10, 0.41)                                               | -0.03 (-0.30, 0.23)                                            | 0.21                             |
| Serum DDE                                        | 564                | -0.11 (-0.37, 0.14)                                              | 0.10 (-0.11, 0.31)                                             | 0.38                             |
| Serum PFOS                                       | 604                | 0.32 (-0.24, 0.89)                                               | -0.18 (-0.60, 0.23)                                            | 0.17                             |
| Serum PFOA                                       | 604                | -0.01 (-0.48, 0.46)                                              | 0.02 (-0.42, 0.47)                                             | 0.64                             |
| Serum PFHxS                                      | 604                | -0.03 (-0.23, 0.16)                                              | -0.15 (-0.34, 0.03)                                            | 0.50                             |
| Serum PFDA                                       | 604                | 0.13 (-0.22, 0.49)                                               | -0.16 (-0.47, 0.15)                                            | 0.22                             |
| Serum PFNA                                       | 604                | 0.11 (-0.27, 0.48)                                               | 0.04 (-0.36, 0.44)                                             | 0.72                             |
| Hair mercury                                     | 561                | 0.09 (-0.10, 0.29)                                               | -0.04 (-0.23, 0.16)                                            | 0.29                             |
| Cord blood mercury                               | 538                | 0.14 (-0.11, 0.40)                                               | -0.05 (-0.28, 0.17)                                            | 0.18                             |
| <b>Head circumference (cm)</b>                   |                    |                                                                  |                                                                |                                  |
| Serum $\Sigma$ PCB                               | 564                | 0.25 (0.07, 0.42)                                                | 0.07 (-0.09, 0.23)                                             | 0.39                             |
| Serum DDE                                        | 564                | 0.08 (-0.10, 0.25)                                               | 0.12 (-0.04, 0.27)                                             | 0.60                             |
| Serum PFOS                                       | 604                | 0.48 (0.05, 0.90)                                                | -0.28 (-0.65, 0.09)                                            | 0.01                             |
| Serum PFOA                                       | 604                | 0.10 (-0.23, 0.44)                                               | -0.05 (-0.36, 0.26)                                            | 0.90                             |
| Serum PFHxS                                      | 604                | 0.01 (-0.13, 0.16)                                               | 0.18 (0.05, 0.32)                                              | 0.04                             |
| Serum PFDA                                       | 604                | 0.35 (0.09, 0.62)                                                | -0.08 (-0.33, 0.18)                                            | 0.03                             |
| Serum PFNA                                       | 604                | 0.22 (-0.06, 0.50)                                               | -0.07 (-0.36, 0.21)                                            | 0.30                             |
| Hair mercury                                     | 561                | 0.02 (-0.11, 0.15)                                               | 0.09 (-0.04, 0.21)                                             | 0.64                             |
| Cord blood mercury                               | 538                | 0.07 (-0.08, 0.21)                                               | 0.06 (-0.09, 0.20)                                             | 0.67                             |

<sup>a</sup> Linear regression estimates adjusted for maternal age at delivery, education, parity, pre-pregnancy BMI (continuous) and smoking during pregnancy.
